# Supplementary material for: Demonstration of the dynamic mass redistribution label-free technology as a useful cell-based pharmacological assay for endogenously expressed GABAA receptors
Source: Royal Society of Chemistry journal article supplement (doi:10.1039/c5md00442j), 2015-11-19
Supplement: c5md00442j1.pdf [file c5md00442j1.pdf]

## Supplementary Figure 1

Klein *et al.*

Demonstration of the dynamic mass redistribution label-free technology as a useful cell-based pharmacological assay for endogenously expressed GABA<sub>A</sub> receptors

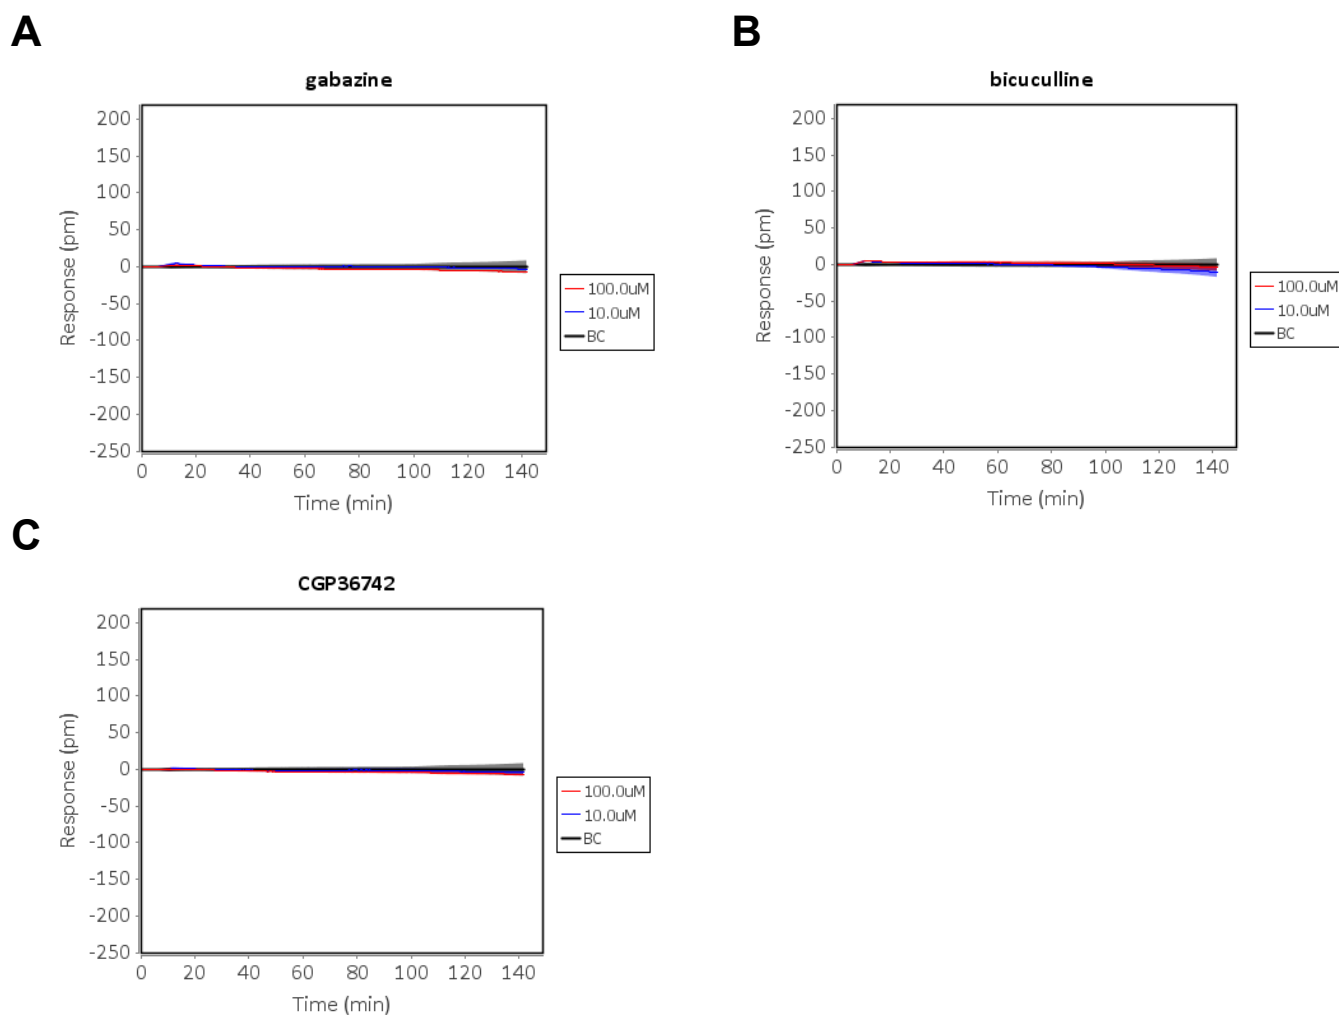

DMR kinetic traces after application of the GABA antagonists gabazine (A), bicuculline (B) and CGP36742 (C) as a function of time (concentrations given as  $\mu\text{M}$ ). Neither of the ligands gave any response.
